# Supplementary material
Source: MDPI journal article supplement (https://www.mdpi.com/2504-477X/5/12/322)
Supplement: s1 [file s1]

# Supporting Information: Polymerization Shrinkage, Hygroscopic Expansion, Elastic Modulus and Degree of Conversion of Different Composites for Dental Application

Alexandre Luiz Souto Borges <sup>1</sup>, Amanda Maria de Oliveira Dal Piva <sup>2</sup>, Sabrina Elise Moecke <sup>1</sup>, Raquel Coutinho de Moraes <sup>1</sup> and João Paulo Mendes Tribst <sup>2,\*</sup>

<sup>1</sup> Institute of Science and Technology, São Paulo State University (Unesp), São José dos Campos 12245-000, Brazil; alexanborges@gmail.com (A.L.S.B.); sabrina.moecke@unesp.br (S.E.M.); raquel.coutinho@unesp.br (R.C.d.M.)

<sup>2</sup> Academic Centre for Dentistry Amsterdam (ACTA), University of Amsterdam and Vrije Universiteit Amsterdam, 1081 LA Amsterdam, The Netherlands; amodalpiva@gmail.com (A.M.d.O.D.P.); joao.tribst@gmail.com (J.P.M.T.)

\* Correspondence: joao.tribst@gmail.com

**Table S1.** Two-Way ANOVA for the volumetric shrinkage according to the resin composite materials and post-polymerization time.

| Source          | DF  | Adj SS | Adj MS  | F-Value | P-Value |
|-----------------|-----|--------|---------|---------|---------|
| Material        | 12  | 114.45 | 9.5377  | 53.85   | 0.000   |
| Time            | 1   | 24.82  | 24.8237 | 140.17  | 0.000   |
| Material × Time | 12  | 12.35  | 1.0292  | 5.81    | 0.000   |
| Error           | 234 | 41.44  | 0.1771  |         |         |
| Total           | 259 | 193.07 |         |         |         |

**Table S2.** Two-Way ANOVA for the hygroscopic expansion according to the resin composite materials and Period of evaluation.

| Source            | DF  | Adj SS  | Adj MS | F-Value | P-Value |
|-------------------|-----|---------|--------|---------|---------|
| Material          | 12  | 7.245   | 0.6038 | 1.47    | 0.131   |
| Period            | 6   | 47.737  | 7.9562 | 19.32   | 0.000   |
| Material × Period | 72  | 32.285  | 0.4484 | 1.09    | 0.294   |
| Error             | 819 | 337.309 | 0.4119 |         |         |
| Total             | 909 | 424.577 |        |         |         |

**Table S3.** One-Way ANOVA for the elastic modulus according to the resin composite material.

| Source   | DF  | Adj SS | Adj MS | F-Value | P-Value |
|----------|-----|--------|--------|---------|---------|
| Material | 12  | 830.4  | 69.20  | 5.61    | 0.000   |
| Error    | 91  | 1123.4 | 12.35  |         |         |
| Total    | 103 | 1953.8 |        |         |         |

**Table S4.** One-Way ANOVA for the Poisson ratio according to the resin composite material.

| Source   | DF  | Adj SS | Adj MS  | F-Value | P-Value |
|----------|-----|--------|---------|---------|---------|
| Material | 12  | 0.6388 | 0.05323 | 3.47    | 0.000   |
| Error    | 91  | 1.3963 | 0.01534 |         |         |
| Total    | 103 | 2.0351 |         |         |         |

**Table S5.** One-Way ANOVA for the degree of conversion according to the resin composite material.

| Source   | DF  | Adj SS | Adj MS | F-Value | P-Value |
|----------|-----|--------|--------|---------|---------|
| Material | 12  | 4904   | 408.64 | 33.19   | 0.000   |
| Error    | 91  | 1120   | 12.31  |         |         |
| Total    | 103 | 6024   |        |         |         |
